# Supplementary material
Source: PubMed Central journal article supplement (PMC2669104)
Supplement: NIHMS91317-supplement-1_si_001.pdf [file NIHMS91317-supplement-1_si_001.pdf]

# Mirror Image DNA Nanostructures for Chiral Supramolecular Assemblies

*Chenxiang Lin, Yonggang Ke, Zhe Li, James H. Wang, Yan Liu\* and Hao Yan\**

## 1. Experimental Section:

**Preparation of the DNA nanostructures:** DNA oligonucleotides were purchased from Integrated DNA Technology (Coralville, IA) and IBA GmbH (Germany), and purified by denaturing PAGE or HPLC. To assemble the nano-junction, equal molar amount of DNA strands was mixed at the final concentration of 1  $\mu$ M in 1xTAE-Mg buffer (40 mM Tris-acetic acid buffer, pH 8, 2 mM EDTA, 12.5 mM magnesium acetate). To assemble the nanotube or 2D array, the involving DNA strand was brought to the concentration of 5  $\mu$ M or 100  $\mu$ M in 1xTAE-Mg solution, respectively. These pre-mixed samples were heated to 90 °C and cooled down to room temperature over 48 hrs.

**AFM imaging:** 2  $\mu$ L of the annealed sample was deposited on a piece of freshly cleaved mica (Ted Pella, Inc.), and left to adsorb on the surface for 2 min. 30  $\mu$ L 1xTAE-Mg buffer was added on the mica to cover the sample. Imaging was performed on a diMultiMode V AFM (Veeco Inc.) in tapping mode, using the tip on the thinner and shorter cantilever of the NP-S tips (Veeco Inc.)

**Exonuclease digestion:** Exonuclease I and Exonuclease III (Epicentre biotechnology) were added to DNA nanostructure samples to reach a final enzyme concentration of 2 U/  $\mu$ L (Exo I) or 20 U/  $\mu$ L (Exo III). The DNA/enzyme mixture was incubated at 37 °C for 45 min.

**Fluorescence microscope imaging:** The exonuclease treated DNA was stained by YOYO-1 (Invitrogen), an intercalating fluorescent dye, at a dye/base-pair ratio of 1:5. 3  $\mu$ L of the fluorescently labelled sample was deposited on a glass slide and covered immediately by a cover-slip. Fluorescence images were acquired using a Zeiss LSM 5 Duo microscope at excitation/emission wavelengths of 470/505.

**CD measurement:** CD spectra were collected between 320 to 200 nm using a JASCO J-815 CD spectrophotometer. To obtain the thermal transition curves, the annealed DNA nano-junction solution was heated from 20 to 85 °C in 1 °C/min increments, and the CD signal was monitored at 280 nm.

**Non-denaturing PAGE:** 10  $\mu$ L of 1  $\mu$ M desired DNA sample was loaded into each well of a pre-casted 14% polyacrylamide (19:1 acrylamide:bis) gel. The electrophoresis was performed in 1xTAE-Mg buffer at constant voltage of 10 V/cm for 5 hrs. The gel was stained with Sybr Gold (Invitrogen) and imaged with the Epichem3 Darkroom gel documentation system (UVP Bioimaging Systems).

## **2. DNA sequences:**

D- and L-DNA were purchased from IDT ([www.idtdna.com](http://www.idtdna.com)) and IBA GmbH (Göttingen, Germany), respectively.

### **DNA sequences used to assemble nano-junction J1:**

J1-1: (16-nt) 5'-CGCAATCCTGAGCACG-3'

J1-2: (16-nt) 5'-CGTGCTCACCGAATGC-3'

J1-3: (16-nt) 5'-GCATTCGGACTATGGC-3'

J1-4: (16-nt) 5'-GCCATAGTGGATTGCG-3'

### **DNA used to assemble one-strand 2D array (for both D-DNA and L-DNA): (32-nt)**

5'-CCATGGACTGGCCAGTGGTTCGAACCTGATCA-3'

### **DNA used to assemble one-strand nanotube (for both D-DNA and L-DNA): (52-nt)**

5'-CCAAGCTTGGACTTCAGGCCTGAAGTGGTCATTCGAATGACCTGAGCGCTC  
A-3'

### 3. Supplemental figures:

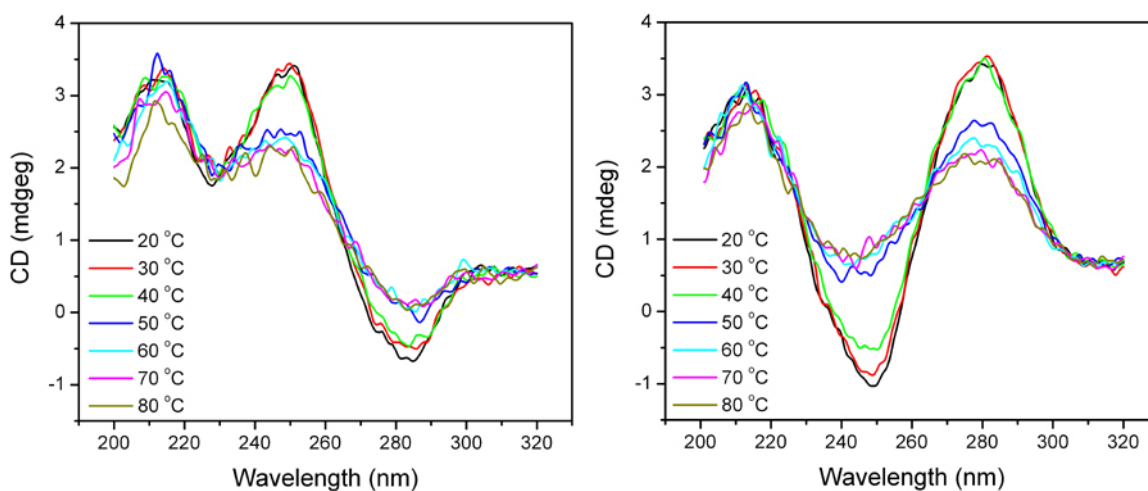

**Figure S1:** Temperature dependent circular dichroism monitoring the thermal denaturing process of L-DNA J1 (left panel) and D-DNA J1 (right panel).

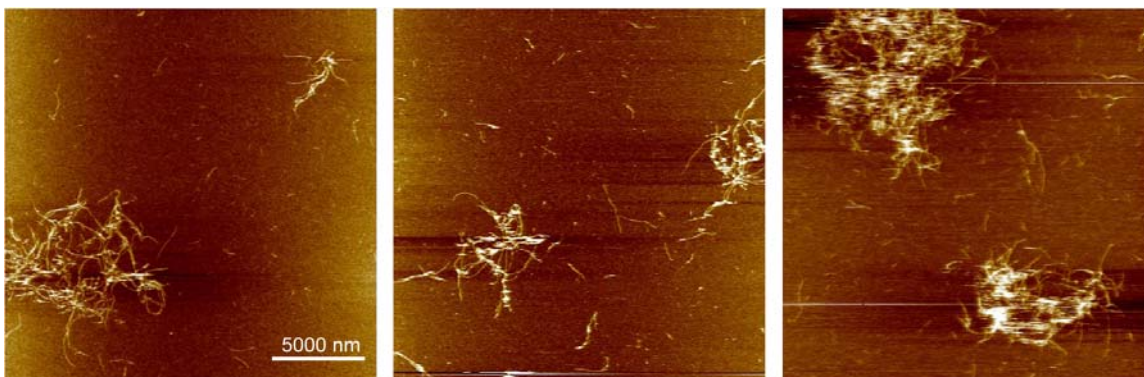

**Figure S2:** Zoom-out AFM images of L-DNA nanotubes. Tubes tend to tether randomly on the surface, consistent with the fluorescence image present in Figure 2c.

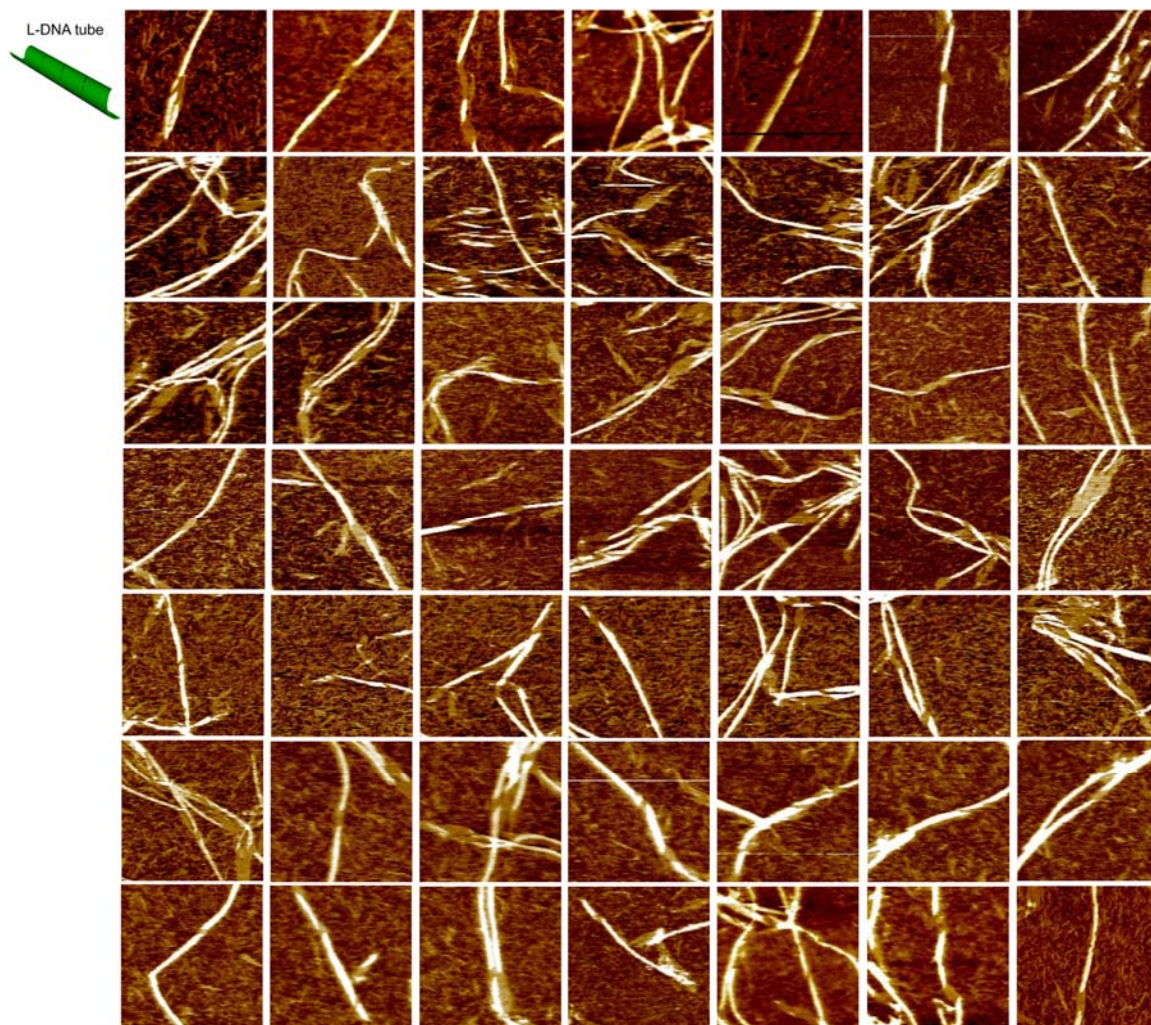

**Figure S3:** More zoom-in AFM images showing the generality of the right-handed chirality of the L-DNA nanotubes. Images are  $1 \times 1 \mu\text{m}^2$ .

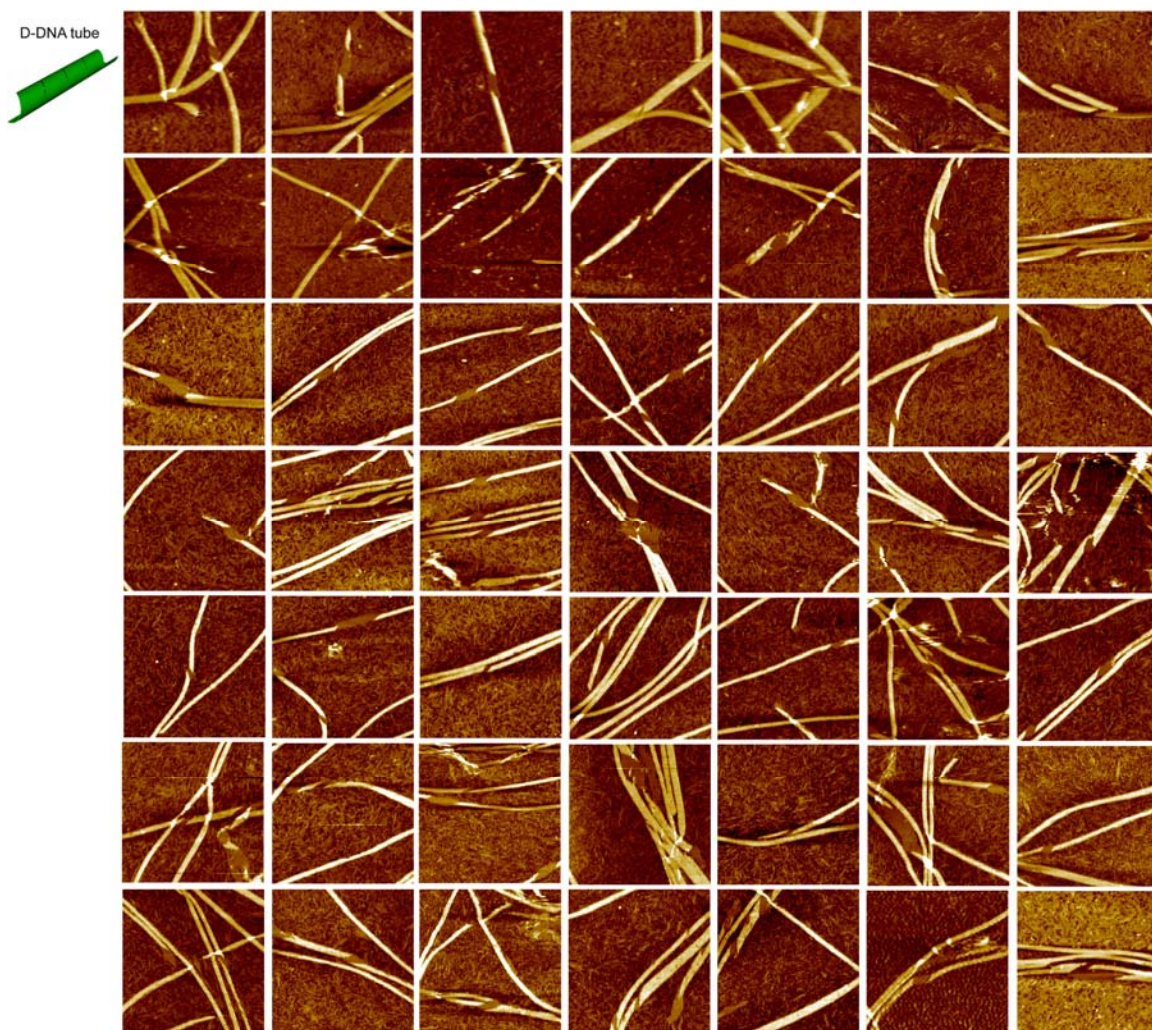

**Figure S4:** More zoom-in AFM images showing the generality of the left-handed chirality of the D-DNA nanotubes. Images are  $1 \times 1 \mu\text{m}^2$ .

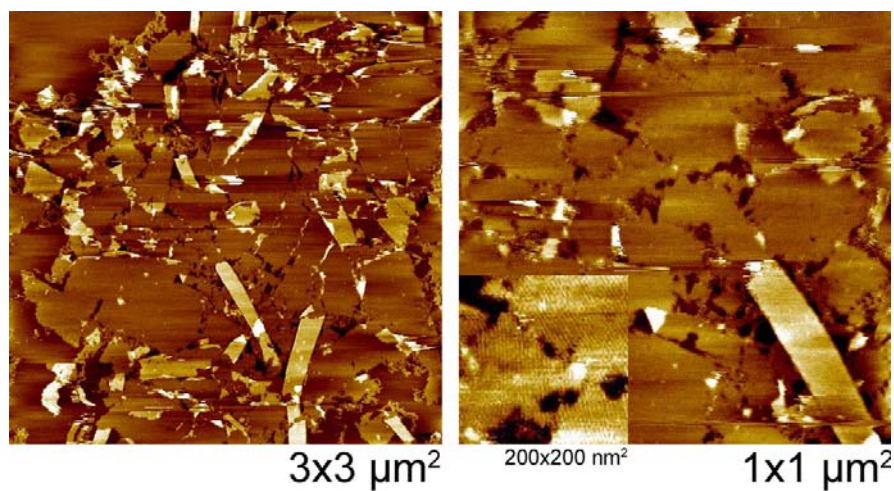

**Figure S5:** More AFM images of the L-DNA 2D array. The inserted panel shows an area where three pieces of array meet together.
